# Supplementary material for: Herbivore-induced chemical and molecular responses of the kelps Laminaria digitata and Lessonia spicata
Source: PLoS One. 2017 Mar 2;12(3):e0173315. doi: 10.1371/journal.pone.0173315 (PMC5333891; doi:10.1371/journal.pone.0173315)
Supplement: S10 Table — (XLSX) [file pone.0173315.s011.xlsx]

## Sheet: S10 Table
Unigene ID	qPCR Fold-Change (Grazed/ Control)				2-way ANOVA (p-value)
	6h	12h	24h	48h	Grazing	Time	Grazing x Time
Ls_contig00025	0.574542	0.62105	0.132532	1.746	0.537225	0.050918	0.135154
Ls_contig00134	1.78718	1.30179	1.22468	0.688984	0.675605	0.002159	0.413264
Ls_contig00161	0.0672216	0.305753	0.549796	1.26837	0.317056	0.689023	0.66082
Ls_contig00239	2.78159	3.98861	21.6872	14.0852	0.000234	0.970573	0.668372
Ls_contig00344	1.83567	2.04188	5.16613	1.03089	2.3e-05	6e-06	0.000507
Ls_contig00467	12.6606	2.49065	49.641	13.1377	0.007303	0.557464	0.438084
Ls_contig01083	8.87596	1.78282	3.28809	1.58501	0.00800459	0.276231	0.464045
Ls_contig01122	1.10708	0.97019	1.94587	0.630099	0.51642	0.507301	0.256638
Ls_contig01374	2.12938	2.51998	5.60574	2.04345	0.003992	0.356251	0.521282
Ls_contig02225	24.2244	12.8075	84.5833	23.7166	0.0151483	0.32098	0.289124
Ls_contig00733	0.84011	0.732839	0.908646	0.856112	0.16618	0.0599544	0.797283
Ls_contig01173	1.50662	1.62075	1.48199	1.55132	0.00848962	0.0270305	0.698217
Ls_contig02470	3.16004	96.9279	18.5686	1.36097	0.00474877	0.209882	0.189761
